# Supplementary material
Source: Springer Nature journal article supplement (https://www.springermedizin.de/resource/supplementary/12885_2007_1136_MOESM7_ESM.pdf/9471202)

**A**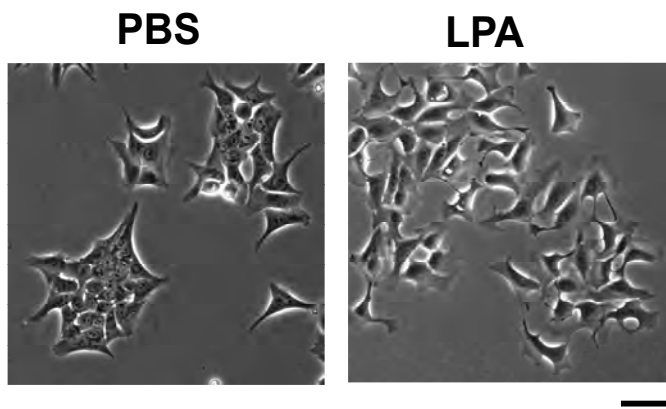**B**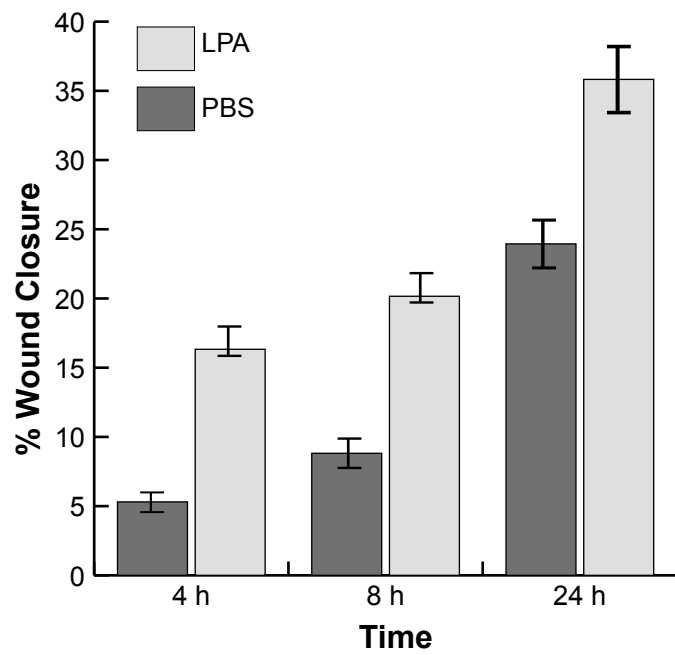**C**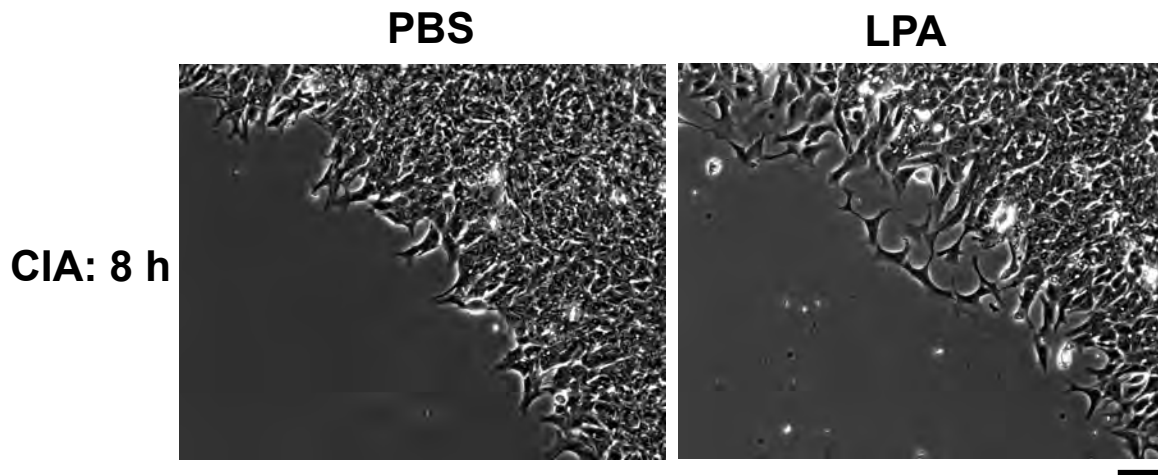

Supplement: MOESM7 [file 9471202]
